# Supplementary material
Source: PubMed Central journal article supplement (PMC2909633)

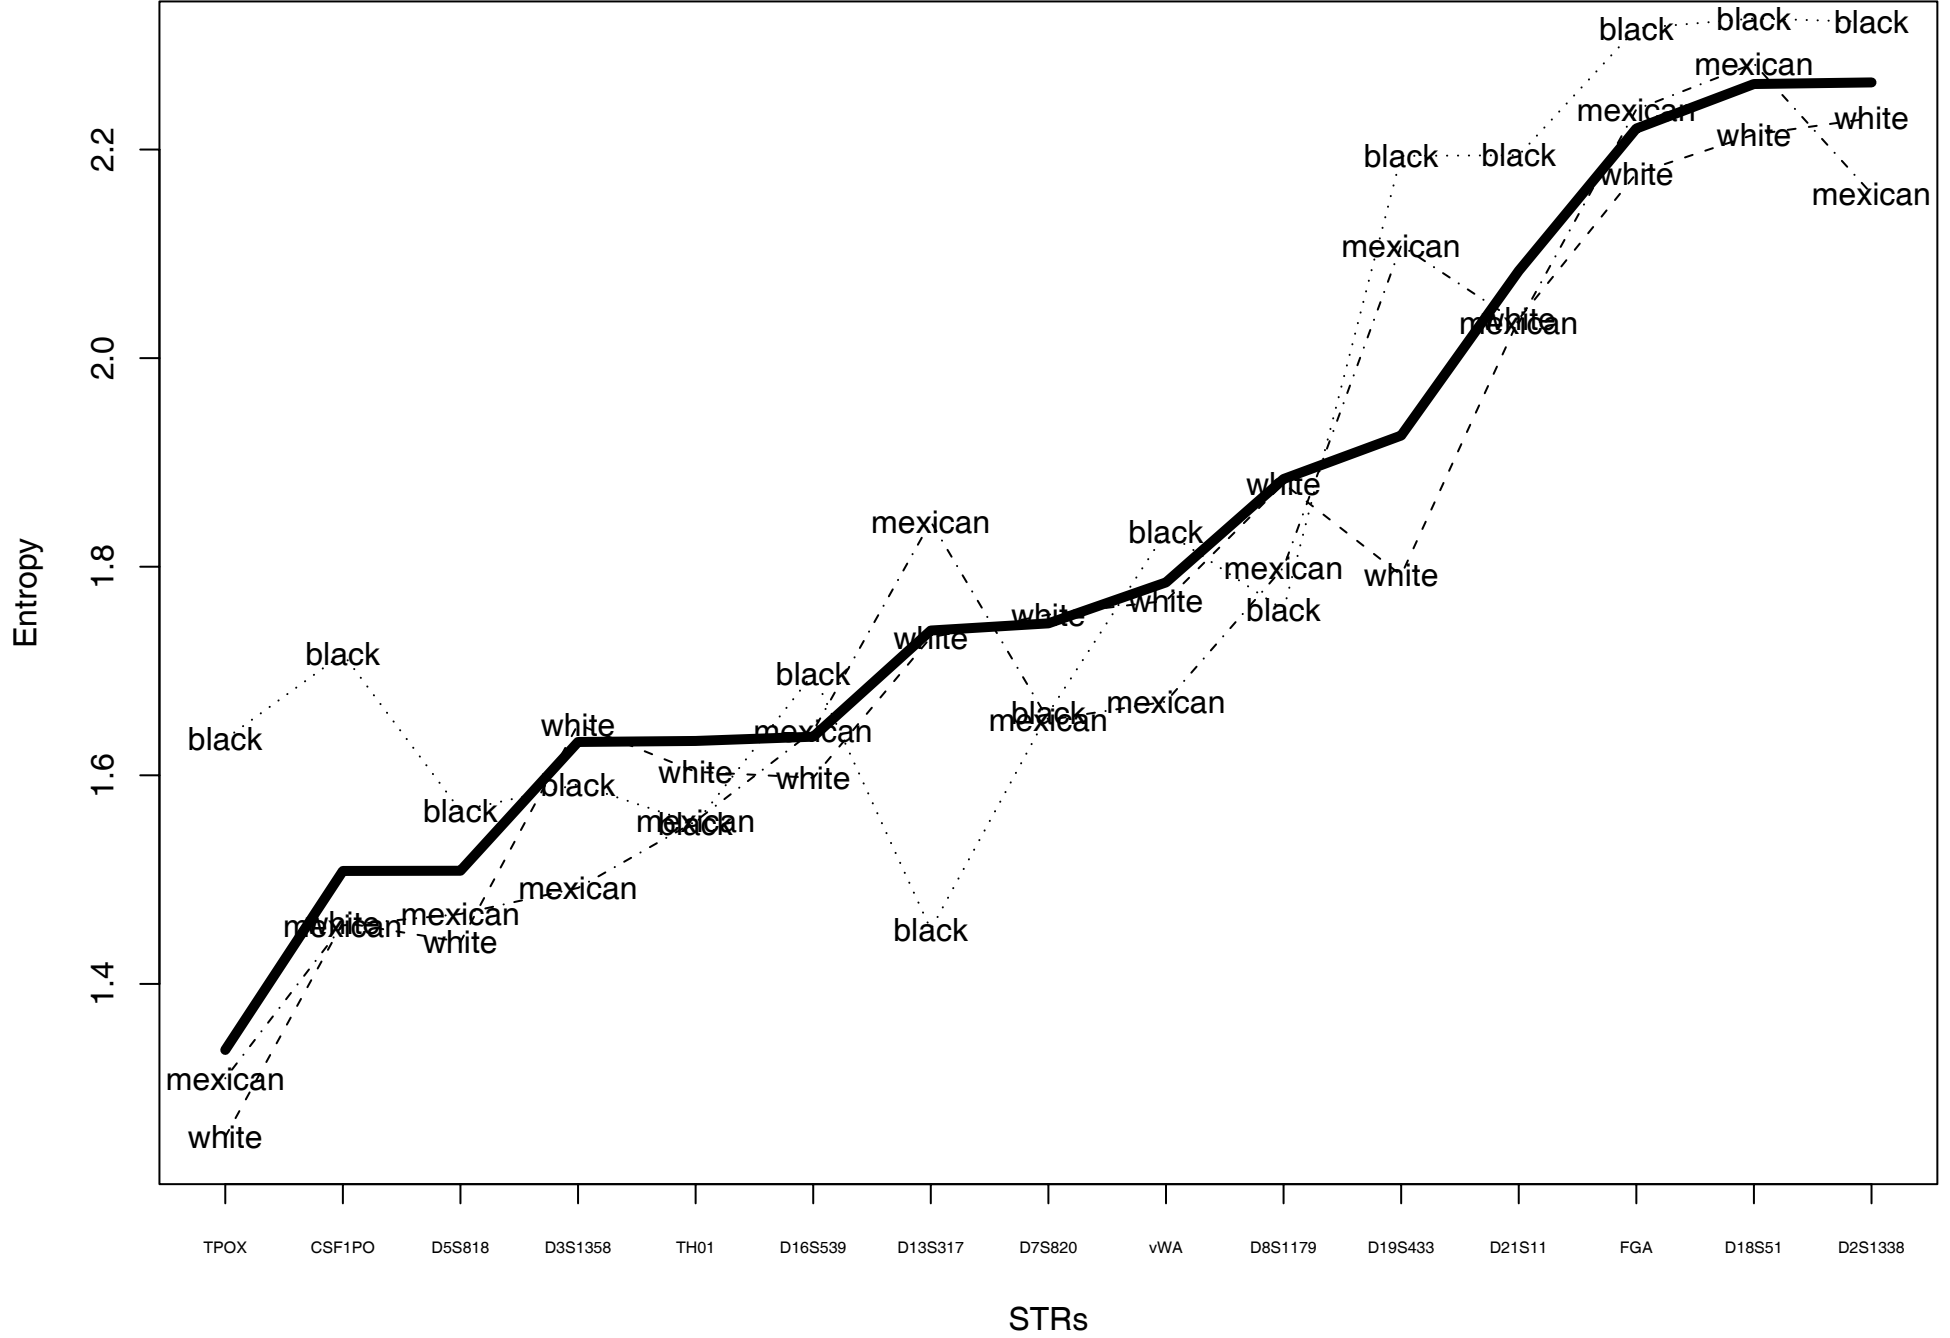

Supplement: NIHMS156460-supplement-Figure_3.pdf [file NIHMS156460-supplement-Figure_3.pdf]
